# Supplementary material for: New viral biogeochemical roles revealed through metagenomic analysis of Lake Baikal
Source: PubMed Central journal article supplement (PMC7678222; doi:10.1186/s40168-020-00936-4), 2020-11-19

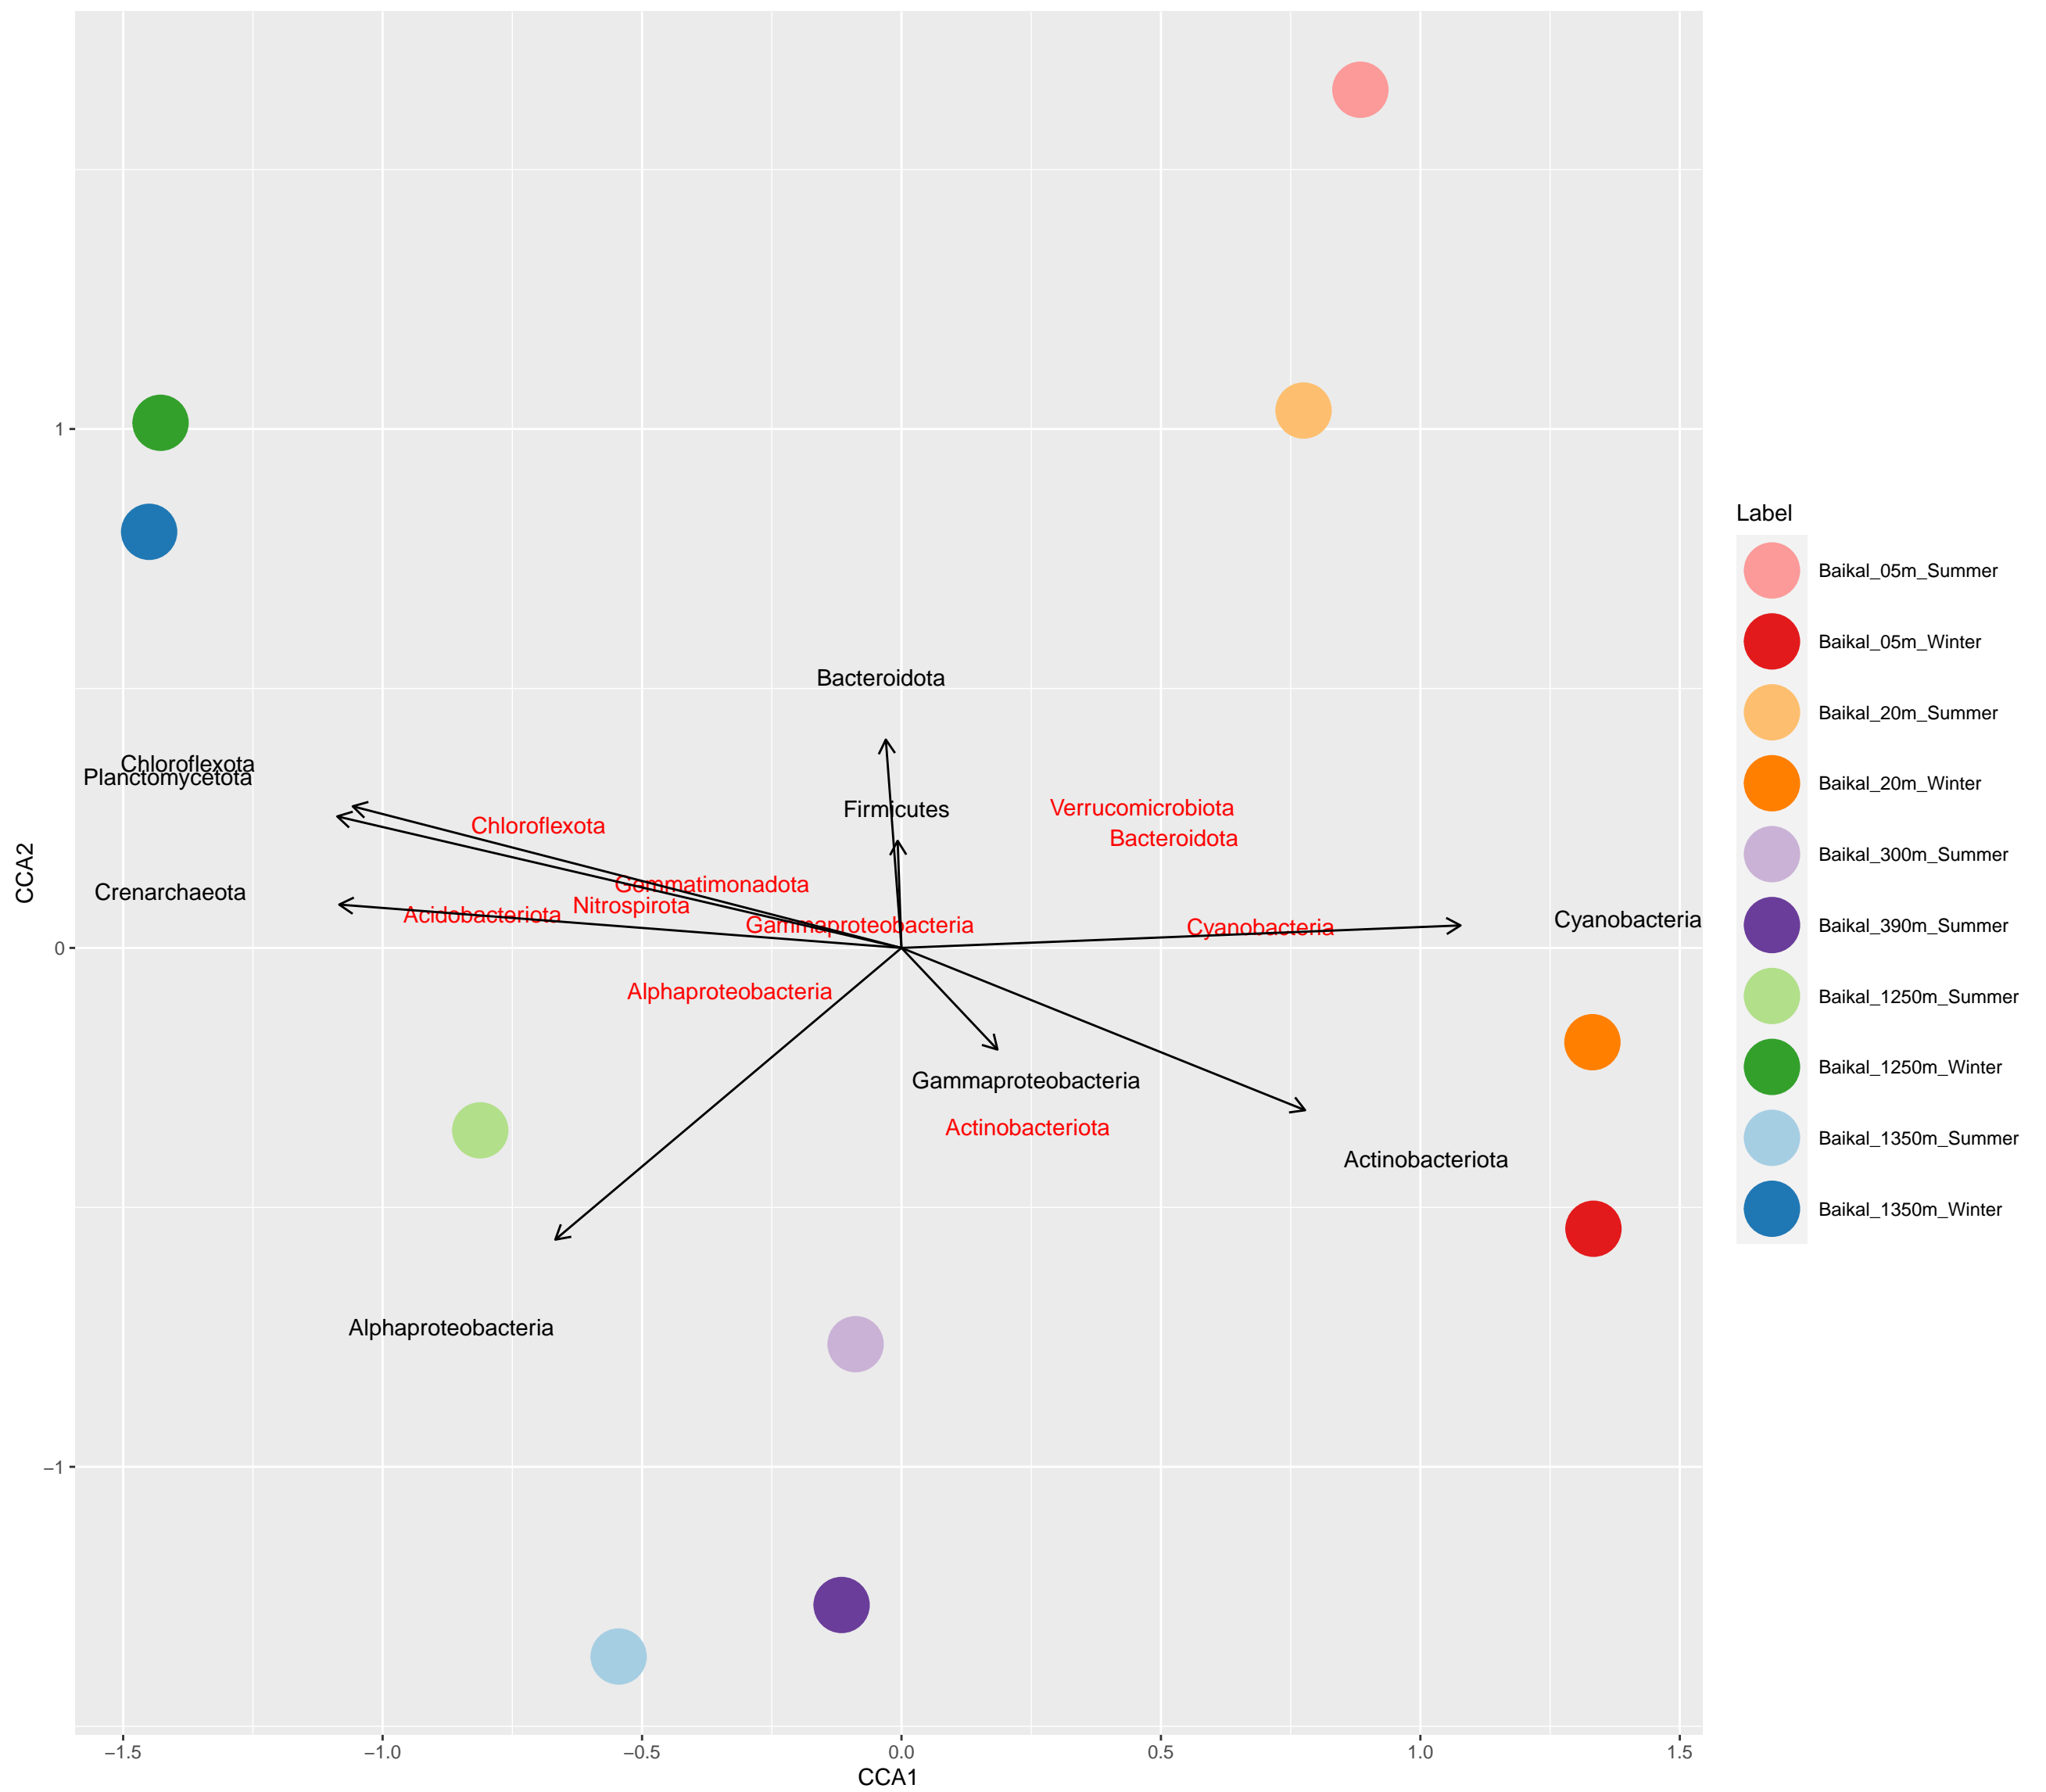

Supplement: 40168_2020_936_MOESM2_ESM.pdf [file 40168_2020_936_MOESM2_ESM.pdf]
